1 Submitted as a preprint to medrxiv.org 4/2021  
2  
3 [4319 words, four tables, two figures, and appendix]  
4

5 **Scabies outbreak management in refugee/migrant**  
6 **camp across Europe 2014-17: a retrospective**  
7 **qualitative interview study of healthcare staff**  
8 **experiences and perspectives**  
9

10 N. A. RICHARDSON<sup>1</sup>, J. A. CASSELL<sup>1,2</sup>, M. G. HEAD<sup>3</sup>, S. LANZA<sup>1</sup>, C. SCHAEFER<sup>4</sup>,  
11 S.L. WALKER<sup>5,6</sup>, J. MIDDLETON<sup>7,8,\*</sup>

12  
13 <sup>1</sup>Department of Primary Care and Public Health, Brighton and Sussex Medical School, Falmer, UK

14 <sup>2</sup>Surrey and Sussex Health Protection Team, Public Health England, Horsham, UK

15 <sup>3</sup>Faculty of Medicine and Global Health Research Institute, University of Southampton, Southampton, UK

16 <sup>4</sup>CADUS e.V., Berlin, Germany.

17 <sup>5</sup>Department of Clinical Research, London School of Hygiene & Tropical Medicine, London, UK

18 <sup>6</sup>Hospital for Tropical Diseases and Department of Dermatology, University College London Hospitals NHS  
19 Foundation Trust, London, UK.

20 <sup>7</sup>NIHR Global Health Research Unit on Neglected Tropical Diseases and Department of Primary Care and  
21 Public Health, Brighton and Sussex Medical School, Falmer, UK

22 <sup>8</sup>Evolution, Behaviour and Environment, School of Life Sciences, University of Sussex, Falmer, UK  
23

24  
25  
26

27 **\*Author for Correspondence:** J. Middleton (<https://orcid.org/0000-0001-5951-6608>),  
28 Scabies Research Project, Department of Primary Care and Public Health, Brighton and  
29 Sussex Medical School, 318 Watson Building, Falmer, BN1 9PH, UK.  
30 (Email: [j.middleton@bsms.ac.uk](mailto:j.middleton@bsms.ac.uk) Twitter: @MedVetAcarology)  
31

32 **ABSTRACT**

33 **Background.** Scabies outbreaks were common in formal and informal refugee/migrant  
34 camps across Europe in 2014-17. This qualitative study aimed to provide insight into the  
35 experiences and perspectives of healthcare staff who treated scabies or managed outbreaks in  
36 these camps.

37 **Methods.** Recruitment was primarily through online networks of healthcare staff involved in  
38 medical care in refugee/migrant settings. Retrospective semi-structured telephone interviews  
39 were conducted, transcribed, and qualitative framework analysis carried out.

40 **Results.** Twelve participants who had worked in camps across seven European countries  
41 were interviewed. They reported that in the camps they had worked scabies diagnosis was  
42 primarily clinical, and without dermatoscopy, and treatment and outbreak management varied  
43 highly. Seven participants stated scabicide treatment was provided in camps whilst they were  
44 there, the remaining five reported only symptomatic management was offered. They  
45 described the camps as difficult places to work, with poor standards of living experienced by  
46 residents. Key perceived barriers to scabies control were (i) lack of Water, Sanitation and  
47 Hygiene facilities, specifically: absent/ limited showers (difficult to wash off irritant topical  
48 scabicides); inability to wash clothes and bedding (may have increased transmission/re-  
49 infestation), (ii) social factors: language; stigma; treatment non-compliance; mobility  
50 (interfering with contact tracing and follow-up treatments), (iii) healthcare factors: scabicide  
51 shortages and diversity; lack of examination privacy; staff inexperience, (iv) organisational  
52 factors: overcrowding; ineffective inter-organisational coordination; lack of support and  
53 maltreatment by state authorities (e.g. not providing basic facilities, and obstruction of self-  
54 care by camp residents and of aid efforts by NGOs).

## Scabies\_RefugeeMigrantCamps\_13\_MedRxiv

55 **Conclusions.** We recommend development of accessible scabies guidelines for camps, use of  
56 consensus diagnostic criteria, and oral ivermectin mass treatments. In addition, as much of  
57 the work described was by small, volunteer staffed NGOs, we should reflect how we in the  
58 wider healthcare community can better support such initiatives, and those they serve.

59 **Keywords** Scabies, outbreaks, refugee, migrant, diagnosis, management.

## 60 **1.0 INTRODUCTION**

61 Scabies is a stigmatised contagious skin condition caused by infestation with the mite  
62 *Sarcoptes scabiei* [1]. Transmission is mainly skin to skin, less commonly via fomites such as  
63 bedding [2]. Symptoms begin 3-6 weeks after first infestation, but as early as one day after  
64 re-infestation [3]. Secondary bacterial infections (with *Staphylococcus aureus* and/or group A  
65 *Streptococcus*) are common [4,5], with potential for serious long-term health impacts,  
66 including chronic rheumatic heart disease and chronic kidney disease [6-8]. Diagnosis is  
67 normally by clinical examination, sometimes with the aid of dermatoscopy [3]. Definitive  
68 diagnosis has been classified as requiring ‘clinical features suggestive of scabies... plus a  
69 visible mite under dermatoscopy ... or a skin scraping or biopsy with identified mites, mite  
70 eggs, or faeces’ [9]. Simultaneous treatment for diagnosed individuals and all close contacts  
71 is required [10]. This normally consists of either topical scabicides applied to the entire body  
72 or oral ivermectin, in both cases often given twice (one week apart) [11]. Advice on  
73 environmental decontamination varies [11]. There are an estimated 455 million annual cases  
74 of scabies, which is designated by WHO as a Neglected Tropical Disease [12]. The highest  
75 burden is in the tropics but in low-burden regions (such as Europe) scabies remains common  
76 and emerges as a public health problem when outbreaks occur in institutions [9,12].

77 Conflicts in Africa and the Middle East triggered increased numbers of people to migrate to  
78 Europe in recent years [13-15]. By the end of 2016 European countries hosted 5.2 million  
79 refugees, 2.9 million (largely from Syria) in Turkey alone [13]. As a result, during the period  
80 2014-17 many formal refugee/migrant camps and reception centres, and informal (often  
81 illegally occupied) camps came into being or markedly expanded (Figure 1). Camp  
82 conditions varied, but an environmental health assessment of an informal one in Calais found  
83 that, (1) residents had to queue to access the 400 daily shower slots for the population of  
84 c.3000 people, which functioned only 3 h daily; (2) healthcare services were limited to clinics

## Scabies\_RefugeeMigrantCamps\_13\_MedRxiv

85 operating from caravans or makeshift structures, largely staffed by volunteers [16]. Formal  
86 reception centres have been described as having better water and sanitation facilities; with  
87 daily cleaning and some providing clothing on arrival. However, they can still become  
88 overcrowded by unexpected large influxes. Lack of sustainable funding can cause staffing  
89 and medicine shortages, resulting in ineffective care [14].

90

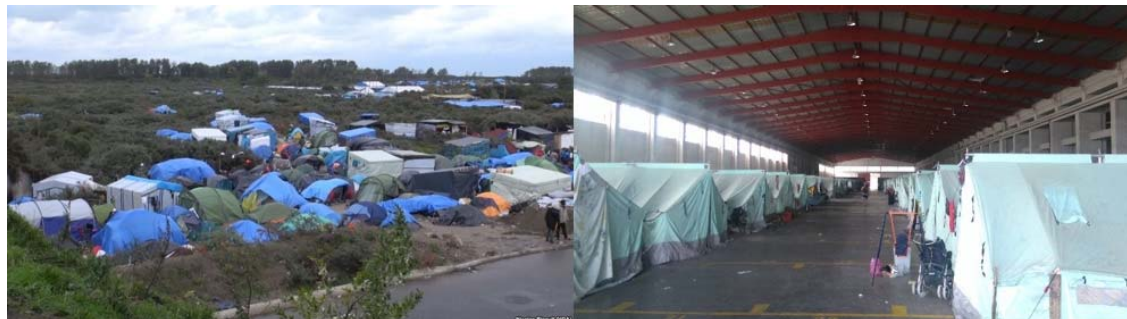

91

92 **Figure 1.** Informal and formal refugee/migrant camps

93 Left: informal camp in Calais, France, 2015 (VOA News - Nicolas Pinault (2015), public domain, original:

94 <https://web.archive.org/web/20210406154625/https://commons.wikimedia.org/wiki/File:Calais2015a.jpg>).

95 Right: formal camp Thessaloniki, Greece, 2016 (Konstantinos Stampoulis (2016), used under CC BY-SA 4.0

96 which also applies to this figure, original:

97 [https://web.archive.org/web/20210406155208/https://commons.wikimedia.org/wiki/File:Refugee\\_hotspot\\_Fessas\\_\(3\).jpg](https://web.archive.org/web/20210406155208/https://commons.wikimedia.org/wiki/File:Refugee_hotspot_Fessas_(3).jpg)).

98

99 Scabies was one of the most frequently reported medical conditions in these settings [16-19].

100 In Germany, it was the third most common outbreak type (behind chickenpox and measles) in

101 shelters for asylum seekers [19]. In France, Doctors of the World UK estimated in 2015 that

102 up to 40% of those seeking their care in the Calais ‘Jungle’ camp had scabies (Cooper C.

103 2015, Appendix, p.2). Scabies outbreaks in reception centres and camps have been widely

104 reported in news and social media, and a media analysis by Seebach *et al.* [20] described

105 much of this coverage as framed with an anti-migrant narrative that stigmatises those affected

106 by scabies whilst positing migrants/refugees as an invasive health threat to European

## Scabies\_RefugeeMigrantCamps\_13\_MedRxiv

107 countries. Multiple camps in France have been evicted with the public justification of  
108 responding to scabies outbreaks (examples of newspaper coverage: Lichfield J 2014; Newton  
109 J 2015, Appendix, p. 2). Despite all this, to our knowledge no study prior to ours has been  
110 published explicitly on scabies outbreak diagnosis, treatment, and management in  
111 refugee/migrant camps in Europe during this period. Further, we are unaware of any  
112 published study on healthcare staff perspectives on barriers and facilitators to treating and  
113 managing scabies in refugee camps globally.

114 This qualitative study aimed to provide an insight into the experiences and perspectives of  
115 healthcare staff who have treated scabies or managed associated outbreaks in refugee/migrant  
116 camps in Europe 2014-17. Specifically, to describe (i) methods used to diagnose, treat, and  
117 manage scabies, and (ii) camp characteristics and perceived barriers and facilitators to  
118 effective scabies outbreak management in these settings.

119

## 120 **2.0 METHODS**

121 A retrospective qualitative study was carried out using semi-structured telephone interviews.

### 122 **2.1 Participant selection and recruitment**

123 Healthcare staff from state and non-governmental organisations who had treated scabies in  
124 refugee/migrant camps in Europe, and/or managed associated outbreaks in the previous three  
125 years were eligible. As far as possible within time and resource constraints, we interviewed a  
126 diverse sample by age, sex, organisation, and location. We recruited by contacting:

- 127 (i) relevant healthcare staff known to the research team;
- 128 (ii) individuals publishing research on medical care in refugee/migrant settings;
- 129 (iii) through online networks of healthcare staff involved in medical care in  
130 refugee/migrant settings, including the alumni network of the European Centre for  
131 Disease Control fellowship program (field epidemiology path) and groups hosted

## Scabies\_RefugeeMigrantCamps\_13\_MedRxiv

132 on facebook.com. To target the latter a public page  
133 (<https://web.archive.org/web/20180523163917/https://www.facebook.com/scabies>  
134 researchproject/) was shared to ten relevant facebook.com hosted groups (Table  
135 S1, Appendix, p.2) and messages sent to members whose posts indicated they  
136 fitted the inclusion criteria.

137 An information sheet was provided to potential participants, followed with a verbal  
138 explanation prior to interviews. Explicit verbal consent was given over the telephone, audio-  
139 recorded and stored separately from the interviews.

### 140 **2.2 Data Collection, Processing, and Analysis**

141 Prior to interviews, participants gave data on personal characteristics and experience. Audio-  
142 recorded, semi-structured telephone interviews were conducted from a private room in the  
143 Department of Primary Care and Public Health at Brighton and Sussex Medical School by  
144 first author NR November 2017 to February 2018. Interviews followed a topic guide based  
145 on published literature and guidance from experts in scabies (epidemiology, JAC;  
146 dermatology, SLW; medical acarology, JM), and were scheduled to be around 40mins long.  
147 However, so as to provide sufficient information power [21] participants were told they could  
148 speak longer as they felt necessary, and to not feel precluded by the pre-written topic guide  
149 from relating any of their experiences and perspectives they though relevant to the study  
150 aims. Data collection and thematic analysis (by NR) were conducted simultaneously so as to  
151 determine when data saturation was reached [22,23], which was prospectively defined as  
152 being no new themes emerging in three consecutive interviews. Once data saturation was  
153 observed no new interviews were conducted as the research team could 'be reasonably  
154 assured that further data collection would yield similar results and serve to confirm emerging  
155 themes and conclusions' [24]. Transcription was undertaken by professional service (9 of 12

156 interviews), or by NR (3 of 12). Anonymized recordings and transcriptions were stored on  
157 secure password-protected university network storage (retained for three years after study  
158 completion). NR coded text in NVivo 11 (QSR International, Melbourne), generated an  
159 initial framework matrix and exported it to Microsoft Excel, in which qualitative framework  
160 analysis was completed (as outlined by Gale *et al.* [25]). Groups of meaningful concepts were  
161 sought in the data and arranged hierarchically into main themes and subthemes. Each  
162 transcript was studied again twice for more evidence of the concepts. Subsequently author  
163 JM reviewed the reported themes and subthemes and read the transcripts, finding no new  
164 relevant themes or subthemes than those grouped by NR and thus reaching consensus.

165 Brighton and Sussex Medical School Research Governance and Ethics Committee approved  
166 the research (ER/BSMS3398/1). We have reported our work in line with the Standards for  
167 Reporting Qualitative Research guidelines [26] (researcher characteristics and checklist,  
168 Appendix, p.2-3).

169

## 170 **3.0 RESULTS**

171 Recruitment halted after 12 interviews as data saturation was reached (no new themes  
172 emerged in the last three interviews). Interviews lasted 34-71min (mean 47).

### 173 **3.1 Study Population**

174 12 participants were recruited with relevant experience in 2014-17: four doctors, four nurses,  
175 three allied health workers (AHWs: an ECG technician, podiatrist, and a first aider), and one  
176 medical student. Six had worked in informal settings, nine in formal camps, within seven  
177 European countries: Greece, France, the Netherlands, Serbia, Belgium, Turkey, Macedonia  
178 (Figure 2). Ten were NGO volunteers, one an independent volunteer, one was employed by a



## Scabies\_RefugeeMigrantCamps\_13\_MedRxiv

179 public health service. Experience in the camps ranged from 4 d to 2.5 y (median 84 d, IQR  
180 233-251 d) (participant characteristics detailed in Table S3, Appendix, p.4).  
181

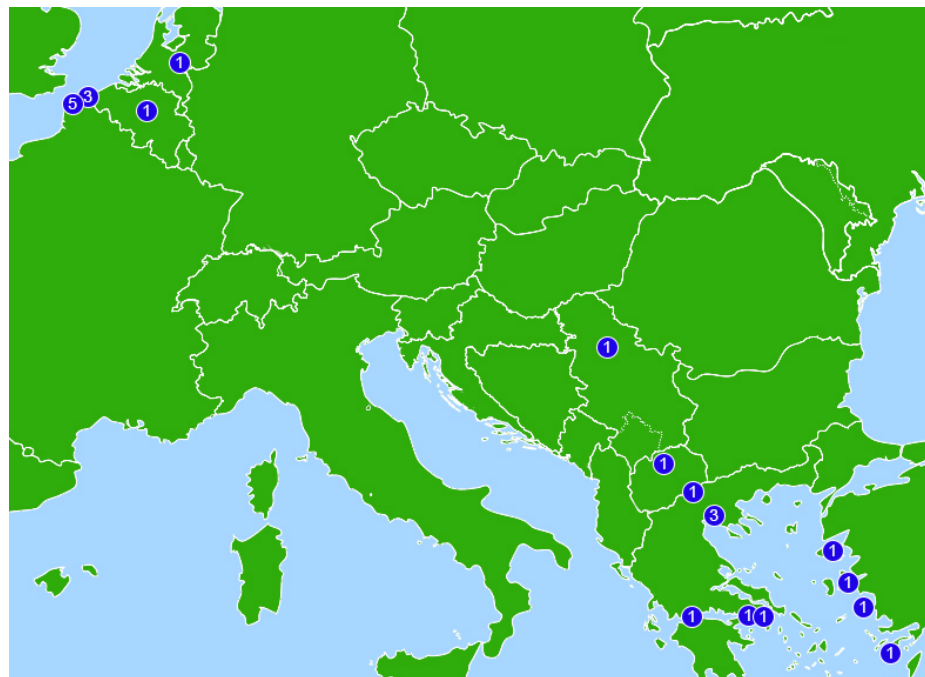

182

183 **Figure 2.** Camp locations and number of participants (n=12) with experience at each site

184 Distribution of camps follows eastern entry migration routes into Europe, and clustering at the English Channel  
185 by those seeking to enter the UK. Left to right: Calais, France, 5 participants all active at informal (IF) camps;  
186 Dunkirk, France, 3 all IF; Brussels, Belgium, 1 formal (F); Heumensoord, Netherlands, 1 F; Belgrade, Serbia, 1  
187 IF; Macedonia, 1 IF; Patras, Greece, 1 IF; Idomeni, Greece, 1 IF; Thessaloniki, Greece, 3 – 2 F, 2 IF; Athens,  
188 Greece, 1 IF; Attica, Greece, 1 F; Lesbos, Greece, 3 –1 F, 2 IF; Çesme, Turkey, 1 IF; Samos, Greece, 2 F; Tilos,  
189 Greece, 1 F. (Figure uses adapted basemap by Julio Reis (2006) created using public domain mapping from the  
190 European Environment Agency, use and changes made under CC BY-SA 3.0 which also applies to this image.

191 Original basemap:

192 [https://web.archive.org/web/20161019140631/https://commons.wikimedia.org/wiki/File:Europe\\_biogeography\\_](https://web.archive.org/web/20161019140631/https://commons.wikimedia.org/wiki/File:Europe_biogeography_blank.svg)  
193 [blank.svg](https://web.archive.org/web/20161019140631/https://commons.wikimedia.org/wiki/File:Europe_biogeography_blank.svg).)

194 **3.2 Diagnosis, treatment, and outbreak management**

195 Scabies diagnosis and treatment are summarized in Table 1, and outbreak management in  
196 Table 2.

197 *3.2.1 Diagnosis*

198 Eleven interviewees (92%) diagnosed scabies based on history and clinical findings. Two  
199 AHWs and the medical student confirmed their diagnosis with a doctor. One participant  
200 occasionally used skin-scrapings in a Greek formal camp and during an outbreak in Serbia. In  
201 one camp diagnosis was routinely carried out by a dermatologist and confirmed by  
202 microscopic examination. No participants reported use of dermatoscopy.

203 *3.2.2 Treatment*

204 Three organisations attempted to follow Médecins Sans Frontiers' (MSF) clinical guidelines  
205 for ordinary scabies treatment [27] (summarized in Appendix, p.5), one of which combined  
206 this with advice from the British National Formulary [28]. One organisation had their own  
207 scabies protocol. Only seven participants (58%) reported acaricide treatment was provided in  
208 camps they worked in whilst they were there. The remaining five (42%) reported only  
209 symptomatic management was offered (detailed in Table 1) because it was felt proper  
210 treatment would be futile due to high chance of re-infestation (four participants), or due to  
211 prescribing restrictions (one participant). In a third of cases treatment offered varied  
212 depending on availability. In NGOs that offered acaricide treatment, it was generally given to  
213 anyone complaining of itching, due to a low threshold of suspicion (5 of 7), however one  
214 NGO only treated individuals with a dermatologist-confirmed diagnosis, and one only treated  
215 'serious cases'.

216 *3.2.3 Outbreak Management*

## Scabies\_RefugeeMigrantCamps\_13\_MedRxiv

217 Eleven participants (92%) believed scabies was difficult to manage, whereas a GP following  
218 a formal camp's scabies protocol considered it 'just a nuisance'. Interviewees described high  
219 variation in outbreak management strategies (Table 2). This was particularly evident in  
220 timings used for permethrin application, which varied from singular treatment to second  
221 applications up to a week later. Three participants (25%) could not recall treatment timings or  
222 if close contacts were treated. In four interviews, participants claimed to treat all close  
223 contacts regardless of symptoms; any variation in treatment strategy was only mentioned  
224 once. Only three participants (25%) reported use of oral ivermectin for scabies treatment in  
225 camps, and this was limited due to lack of availability. Five interviewees (42%) reported  
226 environmental decontamination was considered too challenging, so was not carried out.  
227 Cleaning or replacing clothing and bedding was the most commonly used form of  
228 decontamination. Individuals were given replacement clothing/bedding and old items were  
229 washed (2 of 7), disposed of (3 of 7), or put into plastic bags for 72 h (2 of 7). One formal  
230 camp in Greece burned blankets. Another organisation managed to overcome the limited  
231 amount of clothing by building an inventory of rental clothes for individuals while theirs  
232 were in bags. Generally, attempted decontamination of furniture and shelters was not  
233 performed (only mentioned in two interviews). Where it was, it involved disinfectant or  
234 covering furniture and the insides of shelters in plastic sheeting for 72 h.

### 235 **3.3 Camp characteristics and perceived barriers and facilitators to effective scabies** 236 **outbreak management**

#### 237 *3.3.1 Camp Characteristics*

238 All participants described camps as difficult places to work, and legal status seemed to have  
239 little connection to environmental quality. Participants described the poor standards of living

### Scabies\_RefugeeMigrantCamps\_13\_MedRxiv

240 experienced by camp residents (participant quotes, Appendix, p.6-8). For example, P8

241 described a formal camp (Greece):

242 ‘It’s horrible. There’s only one water source for over two thousand people, there’s not  
243 enough clothes, people are sleeping outside, there’s not enough tents, the hygiene is  
244 terrible. I was there in the summer so it was hot, there’s not enough shading and  
245 people couldn’t find a place outside the sun. It’s more horrible now, as its winter, so  
246 it’s freezing, and there’s no heating. To be honest it’s worse than the refugee camps  
247 I’ve seen in Africa.’

248 P9, who had worked in both formal and informal camps (France and Greece) spoke similarly:

249 ‘They are a human rights violation. I don’t think people should be living in them,  
250 especially in a first world European country this should not be happening. People are  
251 living in cold tents without heating and electricity, there’s rats, there’s scabies, there’s  
252 a lack of toileting facilities, a lack of hygiene, lack of food.’

253 Ten participants (83%) believed shelter was inadequate or non-existent, two (17%) thought it  
254 very basic. Twelve (100%) described lack of suitable sanitation and hygiene facilities. Five  
255 (42%) described worries regarding safety; either as a result of fights between residents,  
256 mistreatment from state authorities, or worry about stability of camp structures.

#### 257 *3.3.2 Barriers and facilitators to effective scabies outbreak management*

258 Themes and subthemes are illustrated with example quotes in Tables 3 (barriers) and 4  
259 (facilitators), with further participant quotes in Appendix, p.9-25. Each interviewee described  
260 many barriers to effective scabies management. Four key themes arose; lack of Water,  
261 Sanitation and Hygiene (WaSH) facilities, healthcare barriers, social barriers, and  
262 organisational barriers.

### Scabies\_RefugeeMigrantCamps\_13\_MedRxiv

263 Lack of WaSH facilities: The main barrier identified by 10 interviewees (83%) was lack of  
264 access to washing facilities for fabric belongings in order to prevent re-infection. Due to the  
265 lack of resources in camps, three interviewees (25%) described how sharing belongings was  
266 promoting re-infestation, which was amplified by the inability to wash them between owners.  
267 Six interviewees (50%) described the difficulties associated with inability for camp residents  
268 to wash themselves, due to non-existent or insufficient showering facilities. This was  
269 especially relevant regarding topical scabicides, which should be washed off [3].

270 Social barriers: Eight interviewees (67%) felt language differences were a major barrier, both  
271 in understanding individuals' problems and subsequently explaining scabies treatment  
272 regimes and environmental decontamination. Four (33%) felt stigma associated with scabies  
273 infestation adversely affected management. Stigma reduced presentation to services and  
274 individuals were less likely to inform close contacts who required treatment. Treatment non-  
275 compliance was considered a barrier in four interviews (33%), as a result of complicated  
276 management regimes, and competing priorities for camp residents. One participant (8%) felt  
277 the solution was to have a protocol followed by all organisations, which allowed for  
278 continued community reinforcement of the chosen method within a camp. Mobility of the  
279 affected population was a concern for six interviewees (50%), who felt it affected contact  
280 tracing, follow-up treatment, and disrupted scabies elimination efforts.

281 Healthcare barriers: Eight interviewees (67%) considered scabicide availability to be a major  
282 barrier. Cost, prescribing restrictions, and variations in pharmacy stocking contributed to  
283 shortages, and for most NGOs availability relied on donations. Lack of consistency  
284 complicated treatment regimes and fostered mistrust of services. Three interviewees (25%)  
285 felt lack of privacy was a barrier to providing effective care. Some camp residents attempted  
286 to circumvent this by providing photos on phones, however this was not considered as useful

### Scabies\_RefugeeMigrantCamps\_13\_MedRxiv

287 as examinations. Five interviewees (42%) felt healthcare workers accustomed to working in  
288 Europe were not particularly familiar with scabies and therefore didn't recognize or treat it  
289 correctly, and this was exacerbated by high volunteer-turnover.

290 Organisational barriers: Six participants (50%) perceived crowded living as a major barrier to  
291 effective management. Large dormitory-style rooms were perceived to be the hardest in  
292 which to determine close contacts, as were bigger units in which blankets had been used as  
293 partitions between families. Five interviewees (42%) described how poor coordination  
294 between organisations (both NGOs and governmental organizations) was a significant barrier  
295 to effective care. This primarily involved organizations providing different resources without  
296 communicating with each other about appropriate timings (e.g. lack of connection between  
297 timings of treatments, clothing replacement, and access to showers). Two participants  
298 described disrespectful care and stigmatisation by healthcare workers. Ten participants (83%)  
299 described how lack of support and mistreatment by state authorities acted as a major barrier,  
300 most of which was described in informal camp settings (7 of 10). Camp members faced  
301 police brutality (mentioned in two interviews), including having tents slashed, and clothing,  
302 shoes, and bedding confiscated. This encouraged sharing (with potential implications for  
303 transmission), and by adding further challenges to everyday-life it reduced the capacities of  
304 volunteers and patients to focus on treatment and decontamination regimes. It was believed  
305 local state authorities did not want to provide basic facilities necessary for effective scabies  
306 management as they didn't want camps to stay. This went beyond medical neglect to actual  
307 obstruction of aid efforts in some informal camps. One participant reported authorities  
308 'sometimes they cut... water, they try not to get us to be able to give out clothes, they raided  
309 our distribution place.' The participant's explanation was: 'What the government is trying to  
310 do is, they're trying not to get the refugees too comfortable.'

## Scabies\_RefugeeMigrantCamps\_13\_MedRxiv

311 Facilitators: Although two participants (17%) said they did not experience any factors that  
312 aided effective scabies treatment and management, the remaining described five key  
313 facilitators, when available; WaSH facilities, language facilitators, education, treatment  
314 incentives, and coordination of organisations (Table 4). Three (25%) felt access to showers  
315 and washing machines were vital to successful treatment and outbreak prevention. Limited  
316 resources, such as clothing and bedding could be reused without concern of reinfection, and  
317 topical treatment guidelines could be adhered to. Nine interviewees (75%) described the  
318 importance of translators in overcoming language barriers. Only three NGOs used official  
319 translators, the rest were aided by camp residents. One participant described using recorded  
320 voice messages and information sheets in different languages. Four (33%) believed education  
321 of residents played a positive role in successful scabies management, by alerting them to  
322 others who needed treatment and enabling them to educate them in correct treatment  
323 application. This awareness raising was also thought to have reduced associated stigma  
324 within the camps. Four (33%) stated incentives, such as receiving new clothing or just  
325 underwear, were helpful for treatment compliance, therefore minimising spread and re-  
326 infection of scabies. Eight interviewees (67%) reported the positive impact of communication  
327 between organisations, including information and resource sharing, and enabling direction of  
328 residents to appropriate organisations. The GP who described scabies as only a ‘nuisance’,  
329 attributed that to having a camp scabies protocol. In particular, the ‘ability to pass on a  
330 systematic and well-rehearsed message’ was thought to have improved adherence and general  
331 understanding, therefore improving effective scabies management.

332

## 333 **4.0 DISCUSSION**

334 The crowded and substandard living conditions described by participants provide an ideal  
335 environment for scabies transmission, whilst obstructing treatment and outbreak

## Scabies\_RefugeeMigrantCamps\_13\_MedRxiv

336 management. Some participants believed lack of political will was preventing provision of  
337 suitable living conditions and access to healthcare as governments feared they would  
338 encourage people to stay too long. Going further, participants reported actual obstruction by  
339 authorities of camp resident self-care and NGO aid efforts, with implications for transmission  
340 and control of scabies. Without the support and coordination of all those responsible for the  
341 care of refugees/migrants, successful scabies management will remain highly challenging,  
342 and the resource poor and overcrowded aspects of camp environments which enable  
343 outbreaks will likely remain unchanged. Indeed, in late 2020 a situation similar to the ones  
344 described for 2014-2017 was observed by co-author CS on Lesbos, Greece, in the formal  
345 camp Kara Tepe 2. The NGO CADUS, in which CS works, had been deployed within a  
346 WHO initiative to provide medical care from 26.10-18.12.20. Scabies was widespread among  
347 the camp population of 7500, but the eradication program had to begin with a capacity of ten  
348 treatments per day. A small volunteer-staffed NGO provided the treatment, including  
349 provision of (camp-external) showers, clothes and blankets exchange. At the clinic itself,  
350 mostly only symptomatic treatment could be offered, which was perceived as highly  
351 unsatisfactory by CADUS medical staff. The overcrowded camp lacked adequate showers  
352 and facilities to wash clothes.

### 353 **4.1 Diagnosis and treatment**

354 No participants were aware of dermatoscopy use in camps which is not surprising given the  
355 expense of equipment, a lack of individuals with the necessary training, and reduced  
356 sensitivity of dermatoscopy when examination time is limited by outbreak size [29].  
357 However, the 2018 publication of consensus criteria for the diagnosis of scabies provides a  
358 global standard for clinical diagnosis, though it will require validating in these settings [30].  
359 Some participants suggested screening on entry to camps as part of routine medical checks,  
360 conducted in an attempt to reduce entry of new infestations [31]. This may be feasible in



## Scabies\_RefugeeMigrantCamps\_13\_MedRxiv

361 camps and has been carried out in reception centres specifically for scabies [32]. However, in  
362 informal camps screening may not be consented to by those seeking entry and NGOs may not  
363 have sufficient resources to adequately screen individuals, which may lead to false  
364 positives/negatives. In addition, the asymptomatic incubation period of scabies would mean  
365 some potential outbreak index cases would still be missed.

366 Participants reported that the use of topical scabicides caused problems for treatment and  
367 outbreak management in these settings. Firstly, topical scabicide treatment involves full body  
368 coverage with creams, left on for at least half a day. There is limited privacy and individuals  
369 living in close proximity may have wished to avoid being seen treating themselves for a  
370 highly stigmatised condition, and so have been discouraged in applying appropriately.  
371 Secondly, topical scabicides need be washed off to reduce potential irritancy [3] but WaSH  
372 facilities were usually only minimally available (if at all). Mass Drug Administration (MDA)  
373 of oral ivermectin is easier to administer, and were conducted successfully in reception  
374 centres in the Netherlands and Germany during the same period [32,33]. However,  
375 ivermectin is expensive in Europe and unlicensed for scabies control in most European  
376 countries [11] despite a good safety profile [34,35], and inclusion in the 2019 WHO Model  
377 List of Essential Medicines [36]. The potential health impacts of chronic conditions  
378 secondary to scabies [6-8] also support the notion that timely MDAs in these settings will  
379 have the benefit of reducing long term health risks and probably overall health costs.

380 Participants reported widespread use of camp residents as informal translators, but this raises  
381 concerns about confidentiality, and ad-hoc interpreters often misinterpret or omit important  
382 medical information [37].

### 383 **4.2 Outbreak management**

## Scabies\_RefugeeMigrantCamps\_13\_MedRxiv

384 Discrepancies in management reflect lack of widely accepted standard outbreak guidelines.  
385 Guidance [for example, 27,28] is often for individual households and does not make  
386 adaptations based on the logistical difficulties of camp environments. Guidelines for  
387 institutional scabies outbreaks exist, yet none are based on a systematic review of the  
388 published evidence [11]. This is also the case for the 2017 “European Guideline” [38]. More  
389 broadly there is a lack of research regarding the most effective interventions for preventing  
390 transmission of scabies to close contacts [39], particularly in refugee/migrant settings.

391 Organisations often favoured attempting to decontaminate clothing and bedding rather than  
392 shelters, yet living mites have been found in dust samples on floors and furniture [40].  
393 Variance in reported decontamination reflects a sparse historic evidence-base [11]. However,  
394 new experimental work [41] could support uniform action. Where washing/drying machines  
395 are available (few camps in this study)  $\geq 10$ min at  $\geq 50^{\circ}\text{C}$  will kill all *S.scabiei* mites and eggs,  
396 though detergents have little effect [41]. Lacking such resources, some of our participants  
397 reported isolating potential fomites with plastic bags/sheeting for 72 h, so as to kill the mites.  
398 Due to mite desiccation this may have been effective in temperate-dry settings, but if bags  
399 were left outdoors in the cold and damp mite survival can be longer. At the outer limit, in  
400 warm-humid conditions elimination can take  $>8$  d [41]. Existing guidance should be updated.

401 Popular narratives that posit a causal association between levels of personal body washing  
402 and becoming infested with *S.scabiei* are contradicted by evidence from epidemiology and  
403 experimental trials [42]. However, even though improving WaSH facilities is unlikely to  
404 reduce skin-to-skin transmission, it is nevertheless required to support treatment and control  
405 where transmission via fomites may be a risk, when topical scabicides are used, and to  
406 minimise secondary infections. It could also be expected to reduce transmission of other  
407 diseases.

## Scabies\_RefugeeMigrantCamps\_13\_MedRxiv

### 408 **4.3 Strengths and Limitations**

409 One study limitation is that time constraints and recruitment methods may have prevented a  
410 fully representative participant selection. Firstly, because recruitment and interviews were  
411 carried out in English, excluding experiences from non-English speaking individuals.  
412 Secondly, because overall there was fairly limited number of participants, and though data  
413 saturation was reached we cannot be certain viewpoints are representative. However, as a  
414 qualitative study it succeeded in giving voice to the subjective perspectives and experiences  
415 of healthcare staff involved in this previously unstudied topic. One study strength was that  
416 the relatively long semi-structured interviews gave participants opportunity to articulate their  
417 perspectives relatively unconstrained by researcher presumptions over what may have been  
418 important to them about their experiences. Nevertheless, inference and public health  
419 recommendations based on this research must be pragmatic with limitations acknowledged.  
420 Telephone interviews prevented acknowledgement of non-verbal cues, but their use did  
421 enable international recruitment. The retrospective nature of the study may have introduced  
422 recall bias.

### 423 **4.4 Future Recommendations**

424 Our study demonstrates the importance of having clear protocols for scabies diagnosis,  
425 treatment, and management in refugee/migrant camps. Systematic evaluation of the evidence  
426 base must be combined with input from individuals and organisations involved on-the-ground  
427 to provide both high-quality and feasible guidelines that explicitly consider camp settings –  
428 both formal and informal. Given most participants were not doctors, guidelines need to be  
429 clear and understandable to everyone involved. Though topical treatments will need to  
430 continue to be provided for children and pregnant women, the difficulties associated with  
431 them in this setting could be avoided for most adult patients through wider licensing and  
432 availability of oral ivermectin. The 2019 ‘WHO Informal Consultation on a Framework for

## Scabies\_RefugeeMigrantCamps\_13\_MedRxiv

433 Scabies Control' recommends populations with  $\geq 10$  prevalence should receive ivermectin  
434 Mass Drug Administrations [43], and we suggest this should include refugee/migrant camps.  
435 However, strategies for lower levels of endemicity in these settings should also be  
436 investigated. More research and advocacy for those living in refugee/migrant camps in  
437 Europe is required to help improve management of common health problems and quality of  
438 life. This is particularly relevant for managing scabies in camps where substandard  
439 conditions, inadequate resources, and lack of guidance can lead to poor quality of care and  
440 ineffective treatment. As indicated by our participants, much of this work is shouldered by  
441 small, volunteer staffed NGOs operating with minimal resources in highly challenging (often  
442 illegally occupied) settings. Without broad political changes, this is likely to remain the case,  
443 and we should reflect on how we in the wider healthcare community can better support these  
444 initiatives, and those they serve.

445

## 446 **AUTHORS CONTRIBUTIONS**

447 This study was carried out as part of the work of the Scabies Research Team based at  
448 Brighton and Sussex Medical School, London School of Hygiene and Tropical Medicine, and  
449 University of Southampton. Authorship order is alphabetical by surname, except the first  
450 (primary researcher) and last (lead supervisor). For clarity we detail contributions using the  
451 CRediT Contributor Taxonomy (<http://docs.casrai.org/CRediT>), and provide employment  
452 and disciplinary descriptions. Conceptualization: JM, JAC. Formal analysis: NR, JM.  
453 Investigation: NR, JM. Methodology: JM. Project administration: NR, JM. Supervision: SL,  
454 JM. Writing – original draft: NR, JM. Visualization: NR, JM. Writing – review & editing:  
455 NR, JAC, MGH, SL, CS, SLW, JM. NR is a junior doctor; JAC a public health physician and  
456 clinical academic in epidemiology; MGH a senior research fellow [global health]; SL a  
457 research co-ordinator; CS is an aid worker; SLW a consultant dermatologist, and associate

## Scabies\_RefugeeMigrantCamps\_13\_MedRxiv

458 professor [infectious and tropical diseases]; JM a research fellow [public health; neglected  
459 tropical skin diseases].

460

### 461 **APPENDICES**

462 Supplementary Material accompanying this paper includes: examples of news articles  
463 reporting scabies in refugee/migrant camps in Europe; facebook.com hosted HCP group  
464 recruitment targets; participant characteristics; Standards for Reporting Qualitative Research  
465 checklist; MSF clinical guidance for scabies; themed quotations from participant interviews.

466

### 467 **ACKNOWLEDGMENTS**

468 We thank the interviewees for their time and openness with our study, and the administrators  
469 and members of the healthcare staff networks who advertised our study on-line. We are also  
470 grateful to our colleagues at Brighton and Sussex Medical School, Elizabeth Ford (for input  
471 into study design), Jessica Stockdale (for producing figure 2), and Maya Khan (for setting up  
472 our Facebook recruitment pages).

473

### 474 **FINANCIAL SUPPORT**

475 This research was financially supported by Brighton and Sussex Medical School from  
476 internal funds and did not receive any specific grant from funding agencies in the public,  
477 commercial, or not-for-profit sectors.

478

### 479 **CONFLICT OF INTEREST**

480 None

## Scabies\_RefugeeMigrantCamps\_13\_MedRxiv

481 Table 1. *Diagnosis, treatment, and outbreak management of scabies (n=12 participants)*

### **DIAGNOSIS**

#### **Clinical features observed in patients**

|                          |    |
|--------------------------|----|
| Itching, mainly at night | 12 |
| Rash                     | 7  |
| Burrow lines             | 6  |
| Infected lesions         | 2  |

#### **Parts of the body examined**

|          |   |
|----------|---|
| Hands    | 8 |
| Arms     | 7 |
| Torso    | 6 |
| Genitals | 4 |
| Legs     | 3 |
| Feet     | 3 |
| Armpits  | 2 |

#### **Equipment used during examination**

|              |   |
|--------------|---|
| Gloves       | 7 |
| Nothing      | 2 |
| Lights       | 2 |
| Microscope   | 2 |
| Dermatoscope | 0 |

#### **Duration of examination**

|              |   |
|--------------|---|
| <5 minutes   | 8 |
| 5-10 minutes | 2 |
| >10 minutes  | 1 |

### **TREATMENT**

#### **Treatment guidelines**

|                            |   |
|----------------------------|---|
| None                       | 8 |
| MSF clinical guidance      | 3 |
| British National Formulary | 1 |
| NGO's own protocol         | 1 |

#### **Management of individual**

## Scabies\_RefugeeMigrantCamps\_13\_MedRxiv

|                                                                                              |   |
|----------------------------------------------------------------------------------------------|---|
| Symptomatic management only                                                                  | 5 |
| Antihistamines                                                                               | 3 |
| Topical steroid                                                                              | 1 |
| Moisturizer                                                                                  | 1 |
| Antibiotics for infections                                                                   | 1 |
| Varying treatment depending on availability                                                  | 4 |
| Unknown topical treatment                                                                    | 3 |
| 1 <sup>st</sup> line: Permethrin 5% cream. 2 <sup>nd</sup> line: Benzyl Benzoate.            | 2 |
| Symptomatic treatment: antihistamines.                                                       |   |
| 1 <sup>st</sup> line: Ivermectin PO. 2 <sup>nd</sup> line (or if ≤15kg): Permethrin 5% cream | 2 |
| Permethrin 5% cream only                                                                     | 1 |
| <b>Who was given acaricide treatment</b>                                                     |   |
| No one                                                                                       | 5 |
| Anyone with itching, plus close contacts                                                     | 4 |
| Anyone with itching                                                                          | 1 |
| Only “serious cases”                                                                         | 1 |
| Cases confirmed by dermatologist, plus close contacts                                        | 1 |

482

## Scabies\_RefugeeMigrantCamps\_13\_MedRxiv

### 483 Table 2. Outbreak management of scabies (n=12 participants)

#### **Timing of treatments**

|                                                                                                                    |   |
|--------------------------------------------------------------------------------------------------------------------|---|
| No treatment                                                                                                       | 4 |
| Unknown                                                                                                            | 3 |
| Cases treated twice, one week apart (Permethrin)                                                                   | 1 |
| Cases and symptomatic contacts treated twice, a few days apart<br>(Permethrin), asymptomatic contacts treated once | 1 |
| Cases treated twice, 3 days apart (Permethrin)                                                                     | 1 |
| Cases treated twice, 24 hours apart (Permethrin and BB)                                                            | 1 |
| Case treated once (Permethrin)                                                                                     | 1 |
| Cases treated once (Ivermectin)                                                                                    | 1 |

#### **Treatment of close contacts**

|                                  |   |
|----------------------------------|---|
| No treatment available to anyone | 4 |
| All close contacts               | 4 |
| Unknown                          | 3 |
| Symptomatic contacts             | 1 |

#### **Environmental decontamination**

|           |   |
|-----------|---|
| Clothing  | 7 |
| Bedding   | 7 |
| None      | 5 |
| Furniture | 1 |
| Shelters  | 2 |

484



## Scabies\_RefugeeMigrantCamps\_13\_MedRxiv

485 Table 3. Barriers to providing effective scabies management

486 Further themed participant quotes in Appendix, p.9-21.

### Key Themes

### Comments from participants

#### *Subthemes*

#### **Lack of WaSH Facilities**

*Inability to wash belongings* 'Part of the treatment is also to wash the bedding, and all clothing in hot water, dry it in a drier... those facilities weren't readily available for anybody at the camp... even if we'd had a sort of endless supply of Permethrin or Ivermectin, I think it still would have been problematic with this problem of re-infection.'

*Lack of showering facilities* 'There is really no shower and there are some areas that are a kind of shower area, but it's not really a shower and its cold water.'

'Treating scabies was problematic because... the lotion, you're supposed to keep it on for 12 hours and then wash it off... and access to showers was not always that easy.'

*Sharing of belongings* 'Charities came in to give clothes, but the clothes weren't ever washed and when someone went across the border... all their stuff was left, and whoever was in the tent just used that.'

#### **Social**

*Language barriers* 'They don't understand why they have to use the cream and what's going on. So, they feel reluctant to comply, and they're like no, it doesn't work. If you don't have proper translators to translate anything to you that also could be a big barrier.'

*Stigma* 'Didn't want to tell the other people they had scabies... there is some sort of stigma of course if you have some sort of rash that you are not clean or something.'

*Non-compliance to treatment* 'I would say to put the stuff all over your body, head down to the toes... to do it all in one night and keep it on for so many hours and then they walk away and then only put a bit of cream here, and a bit of cream there, for a week and then they come back and it hasn't got better.'

*Transient population* 'You have to trace who might be the contact... in the refugee setting you have to also to

## Scabies\_RefugeeMigrantCamps\_13\_MedRxiv

treat patients that might be from the same family, and they just move around. You can't really tell who has slept here, who has not slept here, who might possibly get it.'

### Healthcare

*Availability of medication* 'We don't have the treatment for it, because we don't have the money to buy in the treatment.'

'The medication available is the least convenient medication you could use. If you could use a pill for everyone that would be so much easier.'

*Lack of privacy for medical examinations* 'Everyone sees what we are doing, so if someone has to show something we don't have a closed examination room... you can't really examine them... you can't really touch and see in your own eyes... you have to rely on the photos because they're too shy to show it to you.'

*Inexperienced staff* 'European doctors did not have a lot of experience with scabies, so I think a lot of them didn't realize what they were seeing.'

### Organisational

*Crowded living conditions* 'People were living in fairly cramped conditions which obviously made transmission a high possibility.'

*Poor coordination between organisations* 'Lack of coordination and appropriate communication... I don't think it's the resources; the resources are there they're just not put together in the right way.'

*Poor treatment by authorities* 'Logistical problems, sufficient manpower, sufficient washing machines, sufficient bedding, who cares for this?'

'The refugees have their bedding and their coats and shoes confiscated by police at night.'

487

## Scabies\_RefugeeMigrantCamps\_13\_MedRxiv

488 Table 4. Facilitators to providing effective scabies management

489 Further themed participant quotes in Appendix, p.21-24.

### **Key Themes**

### **Comments from participants**

#### *Subthemes*

#### **WaSH Facilities**

‘People have access to showers... clothes had to be washed in the washing machines... everything else was taken out and burnt. That was the protocol... we didn’t have outbreaks.’

#### **Social**

##### *Language facilitators*

‘We had our own translator who spoke several languages, and there were people who lived in the camp, working or volunteering as translators.’

##### *Education*

‘If you educate the patient very well, make them understand very well what’s going on, and what needs to be done... They understand, and they start to even manage to recognize their friends.’

#### **Treatment incentive**

‘When they found out we would give them another set of clothes and we would buy underwear for them, some more people were interested as they had an incentive to take part.’

#### **Coordination of organisations**

‘We give them a cream 24 hours before and then asked them to get showers, and then we put the creams again. So we partner with shower teams, and also, we partner with people from the distribution team so we could get them new fresh clothes.’

490

491 **REFERENCES**

- 492 [1] B. Trettin, J.A. Lassen, F. Andersen, H. Agerskov, The journey of having scabies– a qualitative study, J.  
493 Nurs. Educ. 9 (2019) 2.
- 494 [2] K. Mellanby, Scabies in 1976, J. R. Soc. Promo. Health. 97 (1977) 32-36.
- 495 [3] C. Griffiths, et al, Rook's Textbook of Dermatology, Wiley-Blackwell, New York, 2016, pp. 1111-1119.
- 496 [4] P.M. Swe, S.L. Reynolds, K. Fischer, Parasitic scabies mites and associated bacteria joining forces against  
497 host complement defence, Parasite Immunol. 36 (2014) 585-593.
- 498 [5] L. Romani, A.C. Steer, M.J. Whitfeld, J.M. Kaldor, Prevalence of scabies and impetigo worldwide: a  
499 systematic review, Lancet Infect. Dis. 15 (2015) 960-967.
- 500 [6] S.D. Chung, K.H. Wang, C.C. Huang, H.C. Lin, Scabies increased the risk of chronic kidney disease: a 5-  
501 year follow-up study, J. Eur. Acad. Dermatol. 28 (2014) 286-292.
- 502 [7] S. Thornley, R. Marshall, P. Jarrett, G. Sundborn, E. Reynolds, G. Schofield, Scabies is strongly associated  
503 with acute rheumatic fever in a cohort study of Auckland children, J. Paediatr. Child H. 54 (2018) 625-632.
- 504 [8] S. Thornley, R. King, R. Marshall, et al., How strong is the relationship between scabies and acute  
505 rheumatic fever? An analysis of neighbourhood factors, J. Paediatr. Child H. 56 (2020) 600-606.  
506 <https://doi.org/10.1111/jpc.14697>.
- 507 [9] J.A. Cassell, J. Middleton, A. Nalabanda, et al., Scabies outbreaks in ten care homes for the elderly: a  
508 prospective study of clinical features, epidemiology, and treatment outcomes, Lancet Infect. Dis. 18 (2018)  
509 894-902.
- 510 [10] NICE, Clinical Knowledge Summaries: Scabies. <https://cks.nice.org.uk/scabies#!scenario>, 2017 Nov  
511 (accessed 10 Nov 2017).
- 512 [11] L.C.J. White, S. Lanza, J. Middleton, et al., The management of scabies outbreaks in residential care  
513 facilities for the elderly in England: a review of current health protection guidelines, Epidemiol. Infect. 144  
514 (2016) 3121-3130.
- 515 [12] D. Engelman, P.T. Cantey, M. Marks, et al., The public health control of scabies: priorities for research and  
516 action, Lancet Infect. Dis. 394 (2019) 81-92.
- 517 [13] UNHCR, Global Trends 2016, United Nations High Commissioner for Refugees, Geneva, Switzerland,  
518 <http://www.unhcr.org/5943e8a34.pdf>, 2017 (accessed 14 July 2018).
- 519 [14] WHO Europe, Greece: assessing health-system capacity to manage large influxes of migrants, World  
520 Health Organization Regional Office for Europe, Copenhagen,

## Scabies\_RefugeeMigrantCamps\_13\_MedRxiv

- 521 [http://www.euro.who.int/\\_data/assets/pdf\\_file/0007/300400/Greece-Assessment-Report-en.pdf?ua=1](http://www.euro.who.int/_data/assets/pdf_file/0007/300400/Greece-Assessment-Report-en.pdf?ua=1),
- 522 2015 (accessed 10 Nov 2017).
- 523 [15]M. Catchpole, D. Coulombier, Refugee crisis demands European Union-wide surveillance!,
- 524 Eurosurveillance 20 (2015).
- 525 [16]S. Dhesi, A. Isakjee, T. Davies, An Environmental Health Assessment of the New Migrant Camp in Calais.
- 526 <https://www.birmingham.ac.uk/Documents/college-les/gees/research/calais-report-oct-2015.pdf>, 2015
- 527 (accessed 10 Nov 2017).
- 528 [17]A.Z. Kortas, J. Polenz, J. von Hayek, et al., Screening for infectious diseases among asylum seekers newly
- 529 arrived in Germany in 2015: A systematic single-centre analysis. Public Health 153 (2017) 1.
- 530 [18]M. Alberer, S. Malinowski, L. Sanftenberg, J. Schelling, Notifiable infectious diseases in refugees and
- 531 asylum seekers: Experience from a major reception center in Munich, Germany, Infection (2018) 1-9.
- 532 [19]A. Kühne, A. Gilsdorf, Infectious disease outbreaks in centralized homes for asylum seekers in Germany
- 533 from 2004-2014. Bundesgesundheitsbla 59 (2016) 570-577.
- 534 [20]S. Seebach, E. Baleriola, M.M. Valasquez, P.T. Cano, Fear of and anger against the other - the strange, the
- 535 sick and the imaginary struggle for survival, Digithum: Las humanidades en la era digital 18 (2016) 13-24.
- 536 [21]K. Malter, V.D. Siersm, A.D. Guassora. Sample Size in Qualitative Interview Studies: Guided
- 537 by Information Power. Qual. Health Res. 26 (2016) 1753-1760.
- 538 [22]G. Guest, A. Bunce, L. Johnson, How Many Interviews Are Enough?: An Experiment with Data Saturation
- 539 and Variability. Field Method 18 (2006) 59-82. <https://doi.org/10.1177/1525822X05279903>.
- 540 [23]P.I. Fusch, L.R. Ness, Are We There Yet? Data Saturation in Qualitative Research, Qual. R. 20 (2015)
- 541 1408-1416. <https://doi.org/10.46743/2160-3715/2015.2281>.
- 542 [24]S.L. Faulkner, S.P.Trotter, Data Saturation, in: J. Matthes, C.S. Davis, F. Robert, R.F Potter (Eds.),
- 543 International Encyclopedia of Communication Research Methods, Wiley, New Jersey, 2017, DOI:
- 544 10.1002/9781118901731.iecrm0060.
- 545 [25]N.K. Gale, G. Heath, E. Cameron, S. Rashid, S. Redwood. Using the framework method for the analysis of
- 546 qualitative data in multi-disciplinary health research. BMC Med. Res. Methodol. 13 (2013) 117.
- 547 <https://doi.org/10.1186/1471-2288-13-117>.
- 548 [26]B.C. O'Brien, I.B. Harris, T.J. Beckman, D.A. Reed, D.A. Cook. Standards for reporting qualitative
- 549 research: a synthesis of recommendations. Acad. Med. 89 (2014) 1245-1251.

## Scabies\_RefugeeMigrantCamps\_13\_MedRxiv

- 550 [27] Médecins Sans Frontiers. Clinical Guidelines: Diagnosis and treatment manual.  
551 [http://refbooks.msf.org/msf\\_docs/en/clinical\\_guide/cg\\_en.pdf](http://refbooks.msf.org/msf_docs/en/clinical_guide/cg_en.pdf), 2016 (accessed 1 April 18).
- 552 [28] Joint Formulary Committee. British National Formulary. [edition number uncollected] ed. London: BMJ  
553 Group and Pharmaceutical Press; [year of publication uncollected].
- 554 [29] S.L. Walker, J. Middleton, J.A. Cassell, Scabies outbreaks in care homes for the elderly – Authors' reply,  
555 *Lancet Infect. Dis.* 19 (2019) 26-27.
- 556 [30] D. Engelman, L.C. Fuller, A.C. Steer, for the International Alliance for the Control of Scabies Delphi panel.  
557 Consensus criteria for the diagnosis of scabies: A Delphi study of international experts, *PLoS Neglect.*  
558 *Trop. D.* 12 (2018) e0006549. <https://doi.org/10.1371/journal.pntd.0006549>.
- 559 [31] U. Wollina, B. Gaber, R. Mansour, et al., Dermatologic challenges of health care for displaced people, *Our*  
560 *Dermatol. Online* 7 (2016) 136-138. Available from:  
561 <http://www.odermatol.com/odermatology/20162/2.Dermatologic-WollinaU.pdf>
- 562 [32] D.T. Beeres, S.J. Ravensbergen, A. Heidema, et al., Efficacy of ivermectin mass-drug administration to  
563 control scabies in asylum seekers in the Netherlands: A retrospective cohort study between January 2014 –  
564 March 2016. *PLoS Neglect. Trop. D.* 12 (2018) e0006401. <https://doi.org/10.1371/journal.pntd.0006401>.
- 565 [33] P. Solbach, L. Sdlacek, R.E. Schmidt, G.M.N. Behrens, A. Jablonka, et al., [Mass therapy with ivermectin  
566 for scabies outbreak during the refugee crisis in Germany in 2015] *Systemische antiinfektive Therapie eines*  
567 *Skabiesausbruchs mit Ivermectin in einem Flüchtlingslager, Anästh. Intensivmed.* 58 (2017) 534-541.
- 568 [34] M. Marks, B. Taotao-Wini, L. Satorara, et al., Long Term Control of Scabies Fifteen Years after an  
569 Intensive Treatment Programme. *PLoS Neglect Trop. D.* 9 (2015) e0004246.  
570 <https://doi.org/10.1371/journal.pntd.0004246>.
- 571 [35] T. Kinyanjui, J. Middleton, S. Guttel et al., Scabies in residential care homes: Modelling, inference and  
572 interventions for well-connected population sub-units. *PLoS Comput. Biol.* 14 (2018) e1006046.  
573 <https://doi.org/10.1371/journal.pcbi.1006046>.
- 574 [36] J. Middleton, S.L. Walker, T. House, M.G. Head, J.A. Cassell, Ivermectin for the control of scabies  
575 outbreaks in the UK, *Lancet* 10214 (2019) 2068-2069.
- 576 [37] G. Flores. The impact of medical interpreter services on the quality of health care: a systematic review,  
577 *Med. Care Res. Rev.* 62 (2005) 255-299.
- 578 [38] C.M. Salavastru, O. Chosidow, M.J. Boffa, M. Janier, G.S. Tiplica, European guideline for the management  
579 of scabies, *J. Eur. Acad. Dermatol.* 31 (2017) 1248-1253.

## Scabies\_RefugeeMigrantCamps\_13\_MedRxiv

- 580 [39]D. FitzGerald, R.J. Grainger, A. Reid, Interventions for preventing the spread of infestation in close  
581 contacts of people with scabies, *Cochrane DB Syst. Rev.* (2014) CD009943.
- 582 [40]L.G. Arlian, S.A. Estes, D.L. Vyszynski-Moher, Prevalence of *Sarcoptes scabiei* in the homes and nursing  
583 homes of scabietic patients, *J. Am. Acad. Dermatol.* 19 (1988) 806-811.
- 584 [41]C. Bernigaud, D.D. Fernando, H. Lu, et al., How to eliminate scabies parasites from fomites: A high-  
585 throughput ex vivo experimental study, *J. Am. Acad. Dermatol.* 83 (2020) 241-245. DOI:  
586 10.1016/j.jaad.2019.11.069.
- 587 [42]J. Middleton, J.A. Cassell, C.I. Jones, Scabies control: the forgotten role of personal hygiene- Authors  
588 reply, *Lancet Infect. Dis.* 18 (2018) 1068-1069.
- 589 [43]WHO. WHO informal consultation on a framework for scabies control, meeting report, WHO Control of  
590 Neglected Tropical Diseases Team, Geneva, <https://www.who.int/publications/i/item/9789240008069>,  
591 (accessed 16 April 2021).
- 592
